# Supplementary material for: SLC16A8 is a causal contributor to age-related macular degeneration risk
Source: PubMed Central journal article supplement — NPJ Genom Med. 2024 Oct 28;9:50. doi: 10.1038/s41525-024-00442-8 (PMC11519927; doi:10.1038/s41525-024-00442-8), 2024-10-28
Supplement: 41525_2024_442_MOESM1_ESM.pdf [file 41525_2024_442_MOESM1_ESM.pdf]

**Supplementary Figure 1.** Manhattan plots of WGS advanced AMD cases and controls using two different protein altering rare variant burden tests.

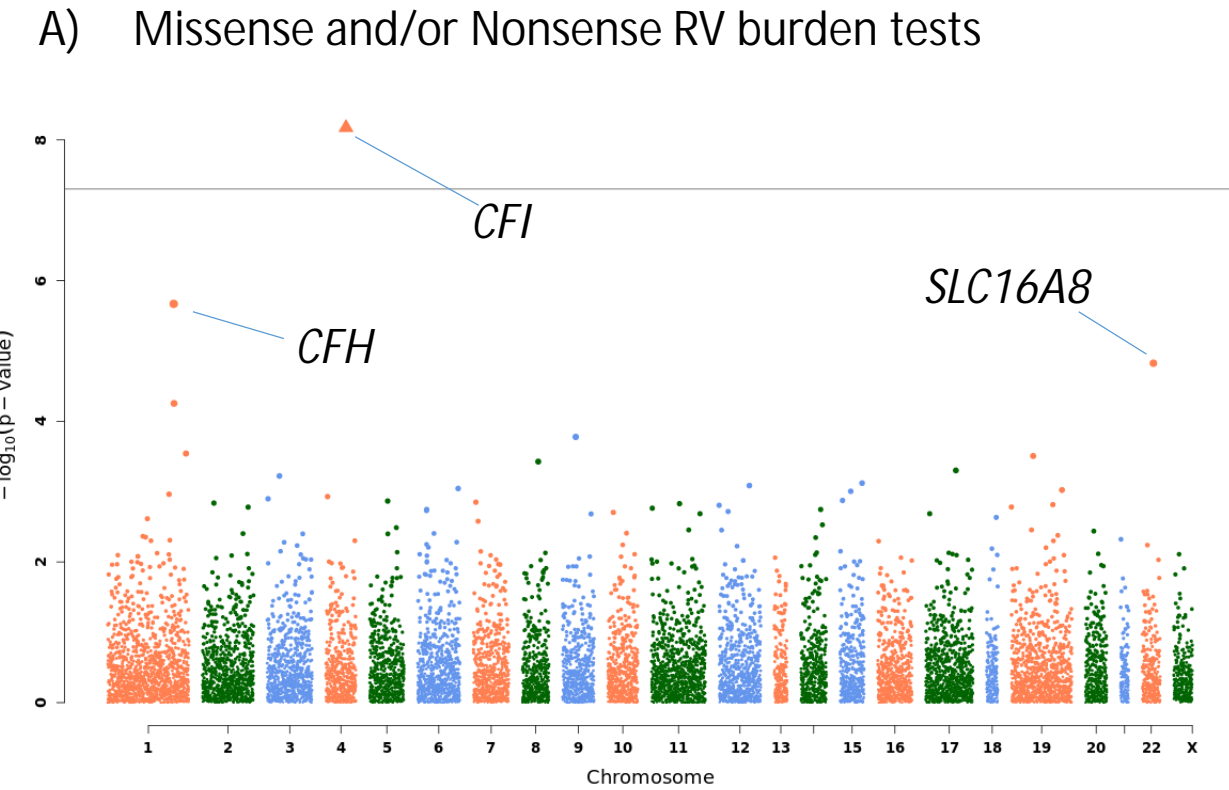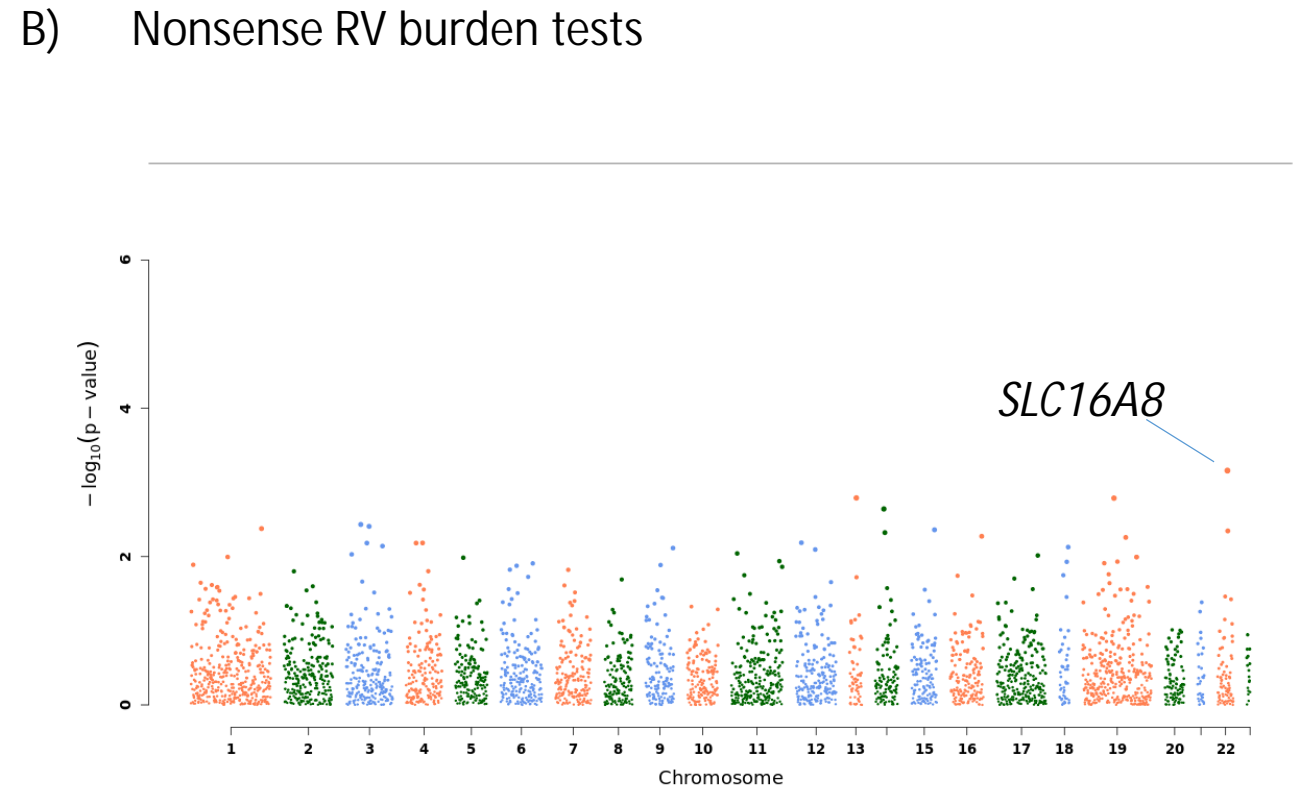

**Supplementary Table 1. List of WGS cohorts for rare variant burden testing.** All WGS cohorts were primarily of European ancestry and non-AMD diseased cohorts from multiple different proprietary internal clinical trials were used as controls.

---

**Study Cohorts for RV Burden Analyses**

---

| Study Name | Disease Phenotype | N    | Reference                                                                                                     | WGS Year   |
|------------|-------------------|------|---------------------------------------------------------------------------------------------------------------|------------|
| ARCHWAY    | AMD               | 195  | <a href="https://clinicaltrials.gov/ct2/show/NCT03677934">https://clinicaltrials.gov/ct2/show/NCT03677934</a> | 2020       |
| AREDS      | AMD               | 1590 | <a href="https://clinicaltrials.gov/ct2/show/NCT00000145">https://clinicaltrials.gov/ct2/show/NCT00000145</a> | 2020       |
| CHROMA     | AMD               | 741  | <a href="https://clinicaltrials.gov/ct2/show/NCT02247479">https://clinicaltrials.gov/ct2/show/NCT02247479</a> | 2016, 2017 |
| Dawn       | AMD               | 346  | <a href="https://clinicaltrials.gov/ct2/show/NCT03034772">https://clinicaltrials.gov/ct2/show/NCT03034772</a> | 2015       |
| Dr. FU AMD | AMD               | 35   | <a href="https://clinicaltrials.gov/ct2/show/NCT02960828">https://clinicaltrials.gov/ct2/show/NCT02960828</a> | 2015       |
| HARBOR     | AMD               | 930  | <a href="https://clinicaltrials.gov/ct2/show/NCT00891735">https://clinicaltrials.gov/ct2/show/NCT00891735</a> | 2014, 2015 |
| LADDER     | AMD               | 157  | <a href="https://clinicaltrials.gov/ct2/show/NCT02510794">https://clinicaltrials.gov/ct2/show/NCT02510794</a> | 2019       |
| LAMPA      | AMD               | 87   | <a href="https://clinicaltrials.gov/ct2/show/NCT01229215">https://clinicaltrials.gov/ct2/show/NCT01229215</a> | 2016       |
| LUCERNE    | AMD               | 369  | <a href="https://clinicaltrials.gov/ct2/show/NCT03823300">https://clinicaltrials.gov/ct2/show/NCT03823300</a> | 2020       |
| MAHALO     | AMD               | 90   | <a href="https://clinicaltrials.gov/ct2/show/NCT01229215">https://clinicaltrials.gov/ct2/show/NCT01229215</a> | 2015       |
| PALMER     | AMD               | 18   | <a href="https://clinicaltrials.gov/ct2/show/NCT02960828">https://clinicaltrials.gov/ct2/show/NCT02960828</a> | 2015       |
| PROXIMA_A  | AMD               | 208  | <a href="https://clinicaltrials.gov/ct2/show/NCT02479386">https://clinicaltrials.gov/ct2/show/NCT02479386</a> | 2016, 2017 |
| PROXIMA_B  | AMD               | 154  | <a href="https://clinicaltrials.gov/ct2/show/NCT02399072">https://clinicaltrials.gov/ct2/show/NCT02399072</a> | 2016, 2017 |
| SAVE       | AMD               | 29   | <a href="https://clinicaltrials.gov/ct2/show/NCT02960828">https://clinicaltrials.gov/ct2/show/NCT02960828</a> | 2015       |
| SPECTRI    | AMD               | 755  | <a href="https://clinicaltrials.gov/ct2/show/NCT02247531">https://clinicaltrials.gov/ct2/show/NCT02247531</a> | 2016       |
| TENAYA     | AMD               | 351  | <a href="https://clinicaltrials.gov/ct2/show/NCT03823287">https://clinicaltrials.gov/ct2/show/NCT03823287</a> | 2020       |

**Supplementary Table 2. Subset of human genes from protein altering rare variant burden tests associated with AMD (P < 0.05) and corresponding ranked orthologs identified for RNAi screenings.** BL (Bloomington Drosophila Stock Center) and VDRC (Vienna Drosophila RNAi Center). See methods.

| Negative Controls          |                         |               |               |                |
|----------------------------|-------------------------|---------------|---------------|----------------|
| Target Gene                | RNAi Stock (BL or VDRC) | %DPP+ (Day 1) | %DPP+ (Day 7) | %DPP+ (Day 14) |
| <i>UAS-mCherry RNAi</i>    | BL35785                 | 100           | 70            | 100            |
| <i>UAS-luciferase RNAi</i> | BL31603                 | 100           | 100           | 100            |
| <i>UAS-LacZ RNAi</i>       | Jasper Lab              | 90            | 80            | 100            |
| <i>UAS-tdTomato</i>        | Jasper Lab              | 100           | 80            | 100            |

| AMD associated human genes and orthologs screened |          |            |             |             |                      |               |               |                |
|---------------------------------------------------|----------|------------|-------------|-------------|----------------------|---------------|---------------|----------------|
| Human Gene                                        | Fly Gene | Ortho Rank | Fly Gene ID | Fly Base ID | RNAi Stock (BL/VDRC) | %DPP+ (Day 1) | %DPP+ (Day 7) | %DPP+ (Day 14) |
| <i>CFH</i>                                        | Hasp     | high       | 35238       | FBgn0032797 | BL-65101             | 70            | n/a           | 70             |
| <i>CFH</i>                                        | Hasp     | high       | 35238       | FBgn0032797 | BL-101250            | 100           | n/a           | 80             |
| <i>RGS7</i>                                       | RSG7     | high       | 32674       | FBgn0024941 | BL-28574             | 100           | n/a           | 100            |
| <i>RGS7</i>                                       | RSG7     | high       | 32674       | FBgn0024941 | VDRC-101733          | 100           | n/a           | 100            |
| <i>SLC16A8</i>                                    | Sln      | moderate   | 36263       | FBgn0033657 | VDRC-109464          | 100           | 100           | 10             |
| <i>SLC16A8</i>                                    | Sln      | moderate   | 36263       | FBgn0033657 | VDRC-4607            | 100           | 100           | 100            |
| <i>SLC16A8</i>                                    | Sln      | moderate   | 36263       | FBgn0033657 | VDRC-4609            | 100           | 100           | 80             |
| <i>SLC16A8</i>                                    | Sln      | moderate   | 36263       | FBgn0033657 | VDRC-109464          | 100           | 90            | 0              |
| <i>SLC16A8</i>                                    | Sln      | moderate   | 36263       | FBgn0033657 | VDRC-4607            | 90            | 100           | 100            |

**Supplementary Data 1:** List of human genes associated with advanced AMD by protein altering RV burden testing.

**Supplementary Data 2:** Distribution of high impact SLC16A8 nonsense and/or missense mediated loss of function rare variants predicted by burden tests to disrupt corresponding MCT3 protein function. Protein domains location in cellular compartments were identified using UNIPROT.
